# Supplementary material for: Comprehensive Pan-Cancer Analysis of GINS2 for Human Tumour Prognosis and as an Immunological Biomarker
Source: Hindawi journal article supplement (doi:10.1155/2022/3119721), 2022-11-23

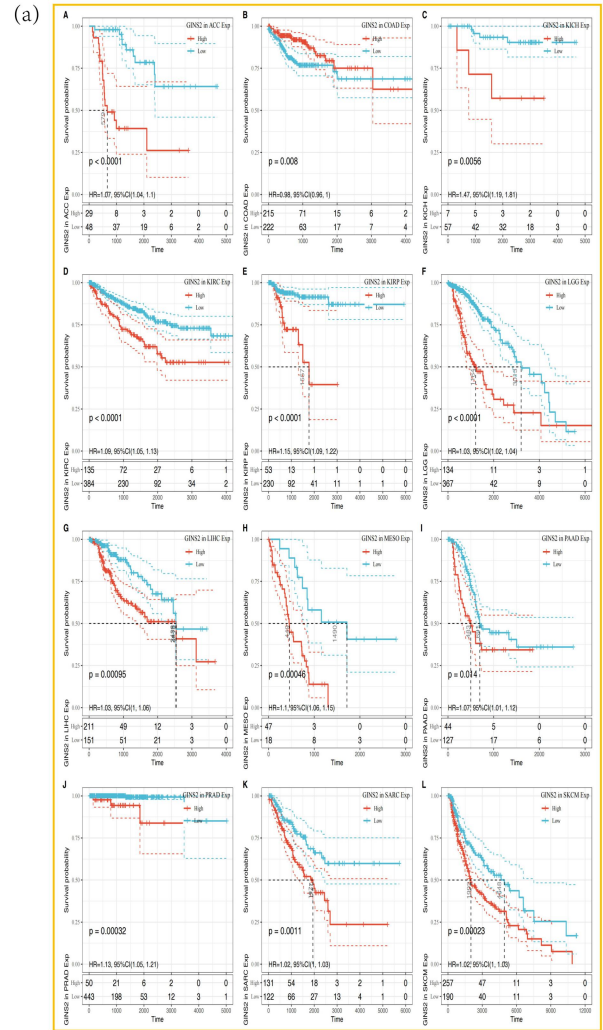

Supplementary Figure 1

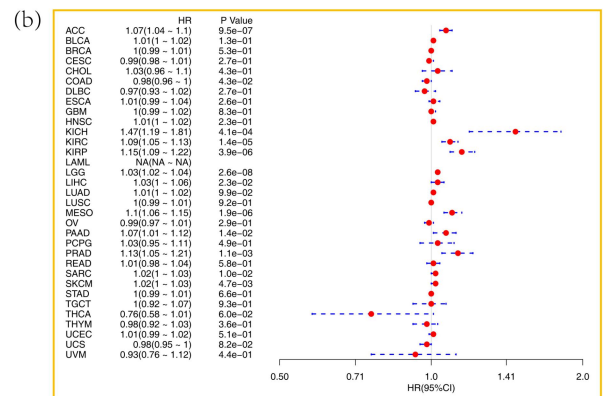

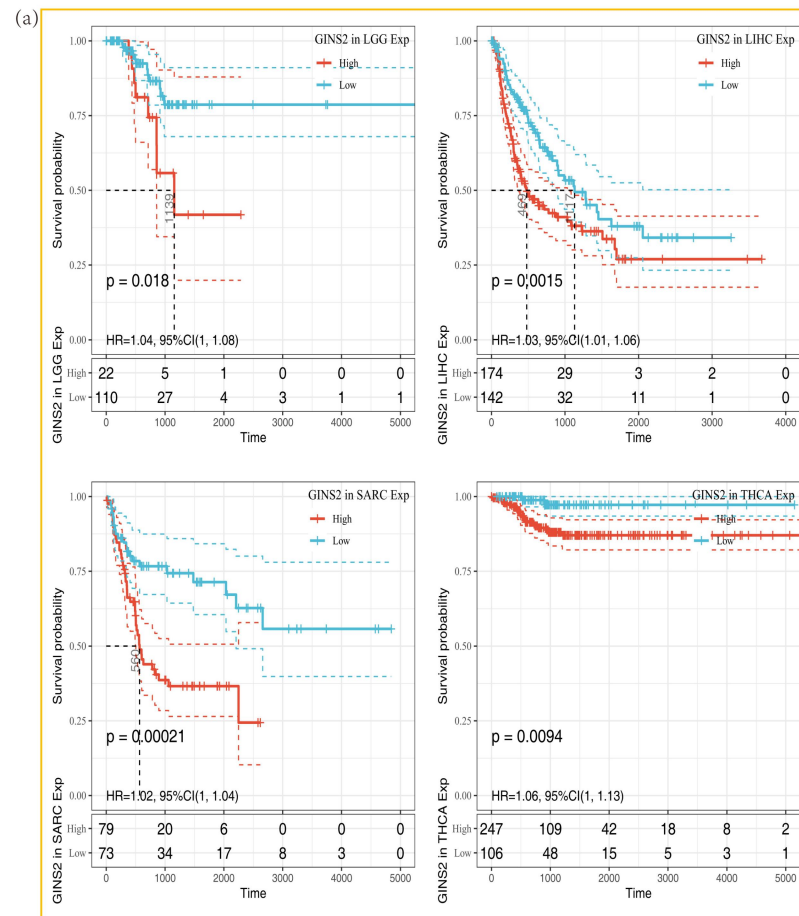

Supplementary Figure 2

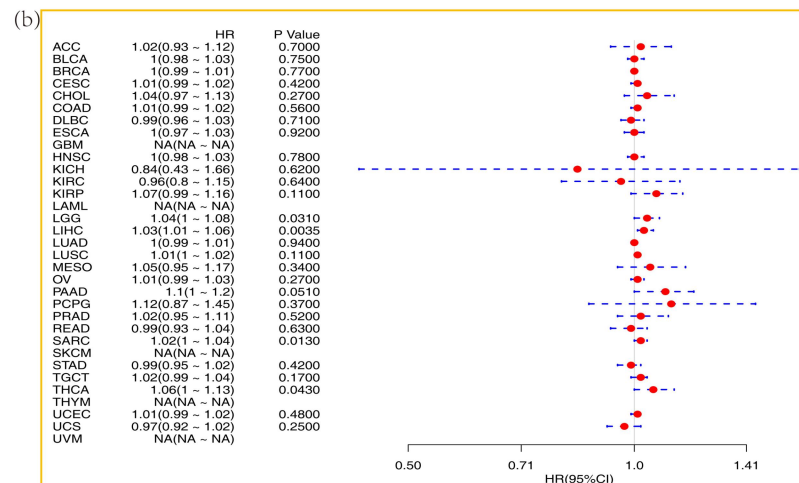

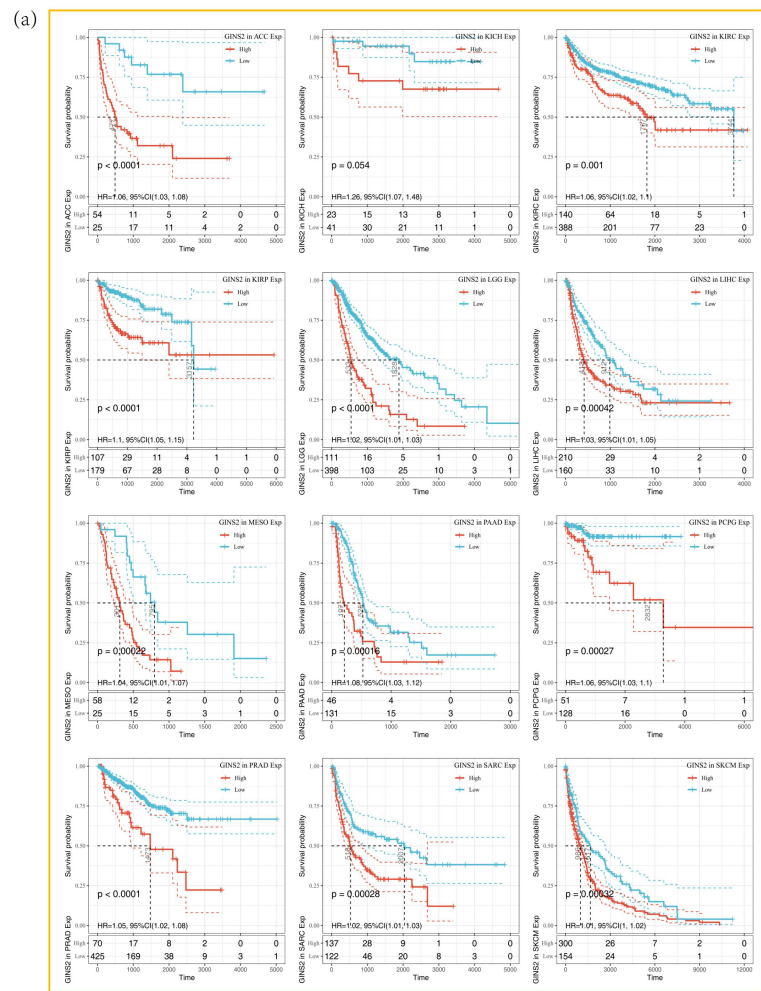

Supplementary Figure 3

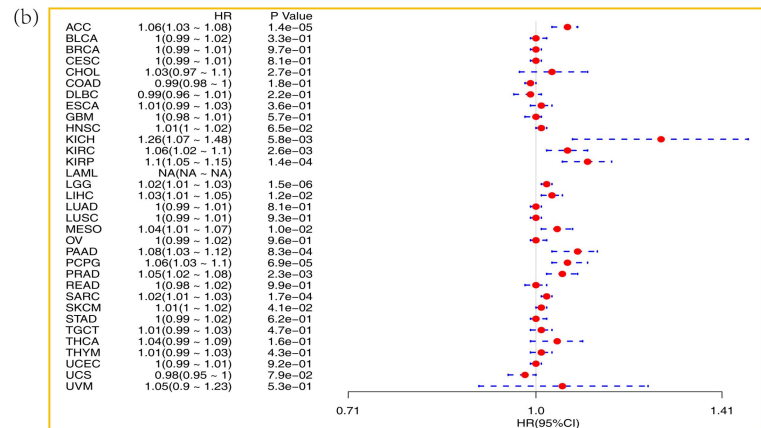

Supplement: f1 [file 3119721.f1.pdf]
